# Supplementary material for: Studying the Geroprotective Properties of YAP/TAZ Signaling Inhibitors on Drosophila melanogaster Model
Source: MDPI journal article supplement (doi:10.3390/ijms24066006), 2023-03-22
Supplement: s1 [file s1]

**Table S12.** Tree-way ANOVA of the effect of Yap/Taz inhibitors on the expression level of antimicrobial genes *AttA*, *DptA*, *CecAI* and Wnt-related gene *dpp*.

| Substance | Sex | Source of variation        | SS       | DF  | MS       | F       | p      |
|-----------|-----|----------------------------|----------|-----|----------|---------|--------|
| VP        | ♂   | Gene                       | 1291.149 | 3   | 430.383  | 716.05  | 0.0000 |
|           |     | Concentration              | 5.029    | 2   | 2.515    | 4.18    | 0.0167 |
|           |     | Age                        | 24.789   | 1   | 24.789   | 41.24   | 0.0000 |
|           |     | Gene × Concentration       | 13.927   | 6   | 2.321    | 3.86    | 0.0012 |
|           |     | Gene × Age                 | 54.670   | 3   | 18.223   | 30.32   | 0.0000 |
|           |     | Concentration × Age        | 8.950    | 2   | 4.475    | 7.45    | 0.0008 |
|           |     | Gene × Concentration × Age | 7.031    | 6   | 1.172    | 1.95    | 0.0749 |
|           |     | Error                      | 113.599  | 189 | 0.601    |         |        |
| ML7       | ♂   | Gene                       | 998.631  | 3   | 332.877  | 102.524 | 0.0000 |
|           |     | Concentration              | 25.997   | 2   | 12.998   | 4.003   | 0.0198 |
|           |     | Age                        | 28.596   | 1   | 28.596   | 8.807   | 0.0034 |
|           |     | Gene × Concentration       | 15.396   | 6   | 2.566    | 0.790   | 0.5786 |
|           |     | Gene × Age                 | 66.178   | 3   | 22.059   | 6.794   | 0.0002 |
|           |     | Concentration × Age        | 10.629   | 2   | 5.315    | 1.637   | 0.1974 |
|           |     | Gene × Concentration × Age | 22.044   | 6   | 3.674    | 1.132   | 0.3456 |
|           |     | Error                      | 603.911  | 186 | 3.247    |         |        |
| CD        | ♂   | Gene                       | 2378.750 | 3   | 792.917  | 360.705 | 0.0000 |
|           |     | Concentration              | 31.259   | 2   | 15.629   | 7.110   | 0.0010 |
|           |     | Age                        | 141.140  | 1   | 141.140  | 64.206  | 0.0000 |
|           |     | Gene × Concentration       | 81.183   | 6   | 13.530   | 6.155   | 0.0000 |
|           |     | Gene × Age                 | 142.516  | 3   | 47.505   | 21.611  | 0.0000 |
|           |     | Concentration × Age        | 17.526   | 2   | 8.763    | 3.986   | 0.0201 |
|           |     | Gene × Concentration × Age | 15.475   | 6   | 2.579    | 1.173   | 0.3222 |
|           |     | Error                      | 422.062  | 192 | 2.198    |         |        |
| AI        | ♂   | Gene                       | 3646.858 | 3   | 1215.619 | 384.355 | 0.0000 |
|           |     | Concentration              | 0.415    | 2   | 0.208    | 0.066   | 0.9365 |
|           |     | Age                        | 90.876   | 1   | 90.876   | 28.733  | 0.0000 |
|           |     | Gene × Concentration       | 18.633   | 6   | 3.105    | 0.982   | 0.4388 |
|           |     | Gene × Age                 | 116.488  | 3   | 38.829   | 12.277  | 0.0000 |
|           |     | Concentration × Age        | 66.143   | 2   | 33.072   | 10.457  | 0.0000 |
|           |     | Gene × Concentration × Age | 27.352   | 6   | 4.559    | 1.441   | 0.2008 |
|           |     | Error                      | 597.761  | 189 | 3.163    |         |        |
| VP        | ♀   | Gene                       | 42.53    | 3   | 14.18    | 31.40   | 0.0000 |
|           |     | Concentration              | 3.72     | 2   | 1.86     | 4.12    | 0.0176 |
|           |     | Age                        | 352.97   | 1   | 352.97   | 781.86  | 0.0000 |
|           |     | Gene × Concentration       | 21.60    | 6   | 3.60     | 7.97    | 0.0000 |
|           |     | Gene × Age                 | 46.96    | 3   | 15.65    | 34.68   | 0.0000 |
|           |     | Concentration × Age        | 4.95     | 2   | 2.48     | 5.49    | 0.0048 |
|           |     | Gene × Concentration × Age | 3.04     | 6   | 0.51     | 1.12    | 0.3501 |
|           |     | Error                      | 85.32    | 189 | 0.45     |         |        |
| ML7       | ♀   | Gene                       | 322.204  | 3   | 107.401  | 324.95  | 0.0000 |
|           |     | Concentration              | 15.619   | 2   | 7.809    | 23.63   | 0.0000 |
|           |     | Age                        | 39.907   | 1   | 39.907   | 120.74  | 0.0000 |
|           |     | Gene × Concentration       | 4.940    | 6   | 0.823    | 2.49    | 0.0242 |
|           |     | Gene × Age                 | 3.454    | 3   | 1.151    | 3.48    | 0.0170 |
|           |     | Concentration × Age        | 17.291   | 2   | 8.645    | 26.16   | 0.0000 |
|           |     | Gene × Concentration × Age | 5.955    | 6   | 0.993    | 3.00    | 0.0080 |
|           |     | Error                      | 62.137   | 188 | 0.331    |         |        |
| CD        | ♀   | Gene                       | 11.73    | 3   | 3.91     | 3.28    | 0.0221 |
|           |     | Concentration              | 4.10     | 2   | 2.05     | 1.72    | 0.1820 |
|           |     | Age                        | 198.98   | 1   | 198.98   | 166.83  | 0.0000 |
|           |     | Gene × Concentration       | 31.12    | 6   | 5.19     | 4.35    | 0.0004 |
|           |     | Gene × Age                 | 162.44   | 3   | 54.15    | 45.40   | 0.0000 |
|           |     | Concentration × Age        | 17.51    | 2   | 8.75     | 7.34    | 0.0008 |

|    |   |                            |        |     |        |        |        |
|----|---|----------------------------|--------|-----|--------|--------|--------|
| AI | ♀ | Gene × Concentration × Age | 42.87  | 6   | 7.14   | 5.99   | 0.0000 |
|    |   | Error                      | 229.00 | 192 | 1.19   |        |        |
|    |   | Gene                       | 711.50 | 3   | 237.17 | 218.81 | 0.0000 |
|    |   | Concentration              | 28.23  | 2   | 14.11  | 13.02  | 0.0000 |
|    |   | Age                        | 235.89 | 1   | 235.89 | 217.64 | 0.0000 |
|    |   | Gene × Concentration       | 35.99  | 6   | 6.00   | 5.53   | 0.0000 |
|    |   | Gene × Age                 | 194.96 | 3   | 64.99  | 59.96  | 0.0000 |
|    |   | Concentration × Age        | 22.82  | 2   | 11.41  | 10.53  | 0.0000 |
|    |   | Gene × Concentration × Age | 14.84  | 6   | 2.47   | 2.28   | 0.0376 |
|    |   | Error                      | 207.02 | 191 | 1.08   |        |        |

VP – Verteporfin; ML7 – ML-7 hydrochloride; CD – Cytochalasin D; AI – AICAR; ♂ – male; ♀ – female; SS – sum-of-squares; DF – degrees of freedom; MS – mean squares. Results of F-tests: F – F-value and p – p-value.
