# Supplementary material for: Studying the Geroprotective Properties of YAP/TAZ Signaling Inhibitors on Drosophila melanogaster Model
Source: MDPI journal article supplement (doi:10.3390/ijms24066006), 2023-03-22
Supplement: s1 [file s1]

**Table S9.** Effects of treatment with solvents on the lifespan of control groups of male and female flies. The results of two independent replicate experiments are presented.

| Solvent (v/v) | Sex | M (days) | dM (%) | FET (M) |        | 90% (days) | d90% (%) | FET (90%) |        | FHT (Early) |        | FHT (Late) |        | N   |
|---------------|-----|----------|--------|---------|--------|------------|----------|-----------|--------|-------------|--------|------------|--------|-----|
|               |     |          |        | p       | pB     |            |          | p         | pB     | p           | pB     | p          | pB     |     |
| 100% water    | ♂   | 36       | 0      | n/a     | n/a    | 40         | n/a      | n/a       | n/a    | n/a         | n/a    | n/a        | n/a    | 293 |
| 100% ethanol  | ♂   | 36       | 0      | 1       | 1      | 40         | 0        | 0.71      | 1      | 0.98        | 1      | 0.719      | 1      | 278 |
| 50% ethanol   | ♂   | 35       | -3     | 0.23    | 0.69   | 40         | 0        | 0.02      | 0.06   | 0.0038      | 0.015  | 0.028      | 0.08   | 290 |
| 10% Cyrene    | ♂   | 36       | 0      | 0.0023  | 0.0069 | 41         | 3        | 0.0003    | 0.0009 | 0.0372      | 0.1117 | 0.0935     | 1      | 287 |
| 100% water    | ♀   | 35       | 0      | n/a     | n/a    | 40         | n/a      | n/a       | n/a    | n/a         | n/a    | n/a        | n/a    | 323 |
| 100% ethanol  | ♀   | 35       | 0      | 0.014   | 0.042  | 40         | 0        | 0         | 0      | 0.003       | 0.009  | 0          | 0      | 292 |
| 50% ethanol   | ♀   | 35       | 0      | 0.56    | 1      | 40         | 0        | 0.0001    | 0.0004 | 1           | 1      | 0.023      | 0.0689 | 300 |
| 10% Cyrene    | ♀   | 36       | 3      | 0       | 0      | 43         | 8        | 0         | 0      | 0.0004      | 0.0011 | 0          | 0      | 282 |

Solvent (v/v) – volume concentration of solvent; ♂ – male; ♀ – female; M (days) – median lifespan; 90% (days) – maximum lifespan (age of 90% mortality); dM, d90% – differences between median and maximum lifespan of the control and experimental flies, respectively; p – p-value; pB – Bonferroni-corrected p-value; FET (M) and FET (90%) – Fisher's Exact Test for median and maximum lifespan, respectively; FHT (Early) and FHT (Late) – Fleming-Harrington Test sensitive against early and later differences, respectively; n/a – not applicable; N – number of flies.
