# Supplementary material for: Studying the Geroprotective Properties of YAP/TAZ Signaling Inhibitors on Drosophila melanogaster Model
Source: MDPI journal article supplement (doi:10.3390/ijms24066006), 2023-03-22
Supplement: s1 [file s1]

**Table S15.** List of primers.

| Gene                                             | Symbol<br>(FlyBase) | Forward/Reverse (5'-3')                                |
|--------------------------------------------------|---------------------|--------------------------------------------------------|
| <i>β-Tubulin at 56D</i>                          | <i>β-Tubulin</i>    | GCAACTCCACTGCCATCC/<br>CCTGCTCCTCCTCGAACT              |
| <i>Ribosomal protein L32</i>                     | <i>RpL32</i>        | GAAGCGCACCAAGCACTTCATC/<br>CGCCATTTGTGCGACAGCTTAG      |
| <i>Cyclin E</i>                                  | <i>CycE</i>         | AAGCAGCGATTCAAACGAGGAC/<br>AGGAGGCAACCGATGACAGATTG     |
| <i>division abnormally delayed</i>               | <i>dally</i>        | TCTACACGACCATCGTGGACAAC/<br>AGGGCACCTCGGGATTATATCG     |
| <i>Death-associated inhibitor of apoptosis 1</i> | <i>Diap1</i>        | AAGCCCTTCACCGATGTGATGC/<br>TTGAGGACTTGGGTGCGCATTG      |
| <i>E2F transcription factor 1</i>                | <i>E2f1</i>         | TCAACGACATTGGCTCGGACTAC/<br>GCGGATTGATGGACACAAAGGC     |
| <i>Myc</i>                                       | <i>myc</i>          | ACGGAAACTATGTTTCAGCGAGAC/<br>TACGGATCAGAGCGGTAAAGGG    |
| <i>vein</i>                                      | <i>vn</i>           | AGTGCCGGGCCAAGAATAAAGC/<br>TCCGTGGGAAAGTGAAGTGGTG      |
| <i>wingless</i>                                  | <i>wg</i>           | ACCCGATCAGCAAGATCCATCAC/<br>ATCTATTATGCTTGCGTCCCTGAC   |
| <i>yorkie</i>                                    | <i>Yki</i>          | CCCAGAATCCAATATCGCCAGCAG/<br>AGCACGCTAAGCCCAGATTTCATTC |
| <i>decapentaplegic</i>                           | <i>dpp</i>          | GACGAAAGGGTATTCAAACCT/<br>TTAGAACGCATAACGATGTAG        |
| <i>Attacin-A</i>                                 | <i>AttA</i>         | TGCTCGTTTGGATCTGACCAAGG/<br>AAAGAGGCACCATGACCAGCATTG   |
| <i>Diptericin A</i>                              | <i>DptA</i>         | TTCACCATTGCCGTCGCCTTAC/<br>ATGTCGTCGGGCATCGGATAAG      |
| <i>cecropin A1</i>                               | <i>CecA1</i>        | TCGCTCAGACCTCACTGCAATATC/<br>TGTCCAATGGTGATGGCCAGAATG  |
