# Supplementary material for: Studying the Geroprotective Properties of YAP/TAZ Signaling Inhibitors on Drosophila melanogaster Model
Source: MDPI journal article supplement (doi:10.3390/ijms24066006), 2023-03-22
Supplement: s1 [file s1]

**Table S14.** Effect of Yap/Taz inhibitors on the expression level of antimicrobial genes *Atta*, *DptA*, *CecAI* and Wnt-related gene *dpp* in *Drosophila* females.

| Gene         | C (μM)  | Age (days) | DT (p)     |      |         |         |
|--------------|---------|------------|------------|------|---------|---------|
|              |         |            | Mean (dCt) | SE   | AE      | TE      |
| Verteporfin  |         |            |            |      |         |         |
| <i>Atta</i>  | control | 10         | 8.07       | 0.12 | n/a     | n/a     |
|              | 0.01    |            | 8.00       | 0.12 | n/a     | 0.815   |
|              | 0.1     |            | 8.31       | 0.07 | n/a     | 0.452   |
|              | control | 20         | 6.05       | 0.10 | 0.000 ↑ | n/a     |
|              | 0.01    |            | 5.68       | 0.18 | 0.000 ↑ | 0.272   |
|              | 0.1     |            | 6.71       | 0.34 | 0.000 ↑ | 0.065   |
| <i>DptA</i>  | control | 10         | 8.61       | 0.24 | n/a     | n/a     |
|              | 0.01    |            | 8.55       | 0.16 | n/a     | 0.845   |
|              | 0.1     |            | 9.33       | 0.18 | n/a     | ↑ 0.047 |
|              | control | 20         | 4.65       | 0.25 | 0.000 ↑ | n/a     |
|              | 0.01    |            | 3.91       | 0.33 | 0.000 ↑ | ↑ 0.021 |
|              | 0.1     |            | 5.71       | 0.29 | 0.000 ↑ | ↓ 0.001 |
| <i>CecAI</i> | control | 10         | 9.26       | 0.17 | n/a     | n/a     |
|              | 0.01    |            | 9.23       | 0.06 | n/a     | 0.909   |
|              | 0.1     |            | 9.16       | 0.09 | n/a     | 0.771   |
|              | control | 20         | 6.37       | 0.13 | 0.000 ↑ | n/a     |
|              | 0.01    |            | 6.69       | 0.06 | 0.000 ↑ | 0.339   |
|              | 0.1     |            | 6.69       | 0.21 | 0.000 ↑ | 0.309   |
| <i>dpp</i>   | control | 10         | 8.38       | 0.07 | n/a     | n/a     |
|              | 0.01    |            | 9.32       | 0.68 | n/a     | ↓ 0.009 |
|              | 0.1     |            | 7.99       | 0.10 | n/a     | 0.284   |
|              | control | 20         | 7.14       | 0.12 | 0.000 ↑ | n/a     |
|              | 0.01    |            | 6.90       | 0.20 | 0.000 ↑ | 0.469   |
|              | 0.1     |            | 6.72       | 0.04 | 0.000 ↑ | 0.222   |
| ML-7         |         |            |            |      |         |         |
| <i>Atta</i>  | control | 10         | 7.08       | 0.21 | n/a     | n/a     |
|              | 0.1     |            | 6.22       | 0.07 | n/a     | ↑ 0.00  |
|              | 1       |            | 7.34       | 0.26 | n/a     | 0.38    |
|              | control | 20         | 7.01       | 0.07 | 0.798   | n/a     |
|              | 0.1     |            | 6.00       | 0.29 | 0.425   | ↑ 0.00  |
|              | 1       |            | 5.66       | 0.12 | 0.000 ↑ | ↑ 0.00  |
| <i>DptA</i>  | control | 10         | 5.26       | 0.22 | n/a     | n/a     |
|              | 0.1     |            | 4.87       | 0.29 | n/a     | 0.18    |
|              | 1       |            | 5.95       | 0.24 | n/a     | ↓ 0.02  |
|              | control | 20         | 5.09       | 0.33 | 0.535   | n/a     |
|              | 0.1     |            | 3.54       | 0.16 | 0.000 ↑ | ↑ 0.00  |
|              | 1       |            | 3.76       | 0.18 | 0.000 ↑ | ↑ 0.00  |
| <i>CecAI</i> | control | 10         | 7.58       | 0.35 | n/a     | n/a     |
|              | 0.1     |            | 7.92       | 0.10 | n/a     | 0.24    |
|              | 1       |            | 8.44       | 0.24 | n/a     | ↓ 0.00  |
|              | control | 20         | 7.57       | 0.09 | 0.990   | n/a     |
|              | 0.1     |            | 6.33       | 0.11 | 0.000 ↑ | ↑ 0.00  |
|              | 1       |            | 7.08       | 0.11 | 0.000 ↑ | 0.11    |
| <i>dpp</i>   | control | 10         | 8.19       | 0.05 | n/a     | n/a     |
|              | 0.1     |            | 8.11       | 0.09 | n/a     | 0.75    |
|              | 1       |            | 8.50       | 0.28 | n/a     | 0.30    |
|              | control | 20         | 7.88       | 0.13 | 0.311   | n/a     |

|               |         |    |       |      |         |        |
|---------------|---------|----|-------|------|---------|--------|
|               | 0.1     |    | 7.52  | 0.17 | 0.065   | 0.25   |
|               | 1       |    | 7.56  | 0.09 | 0.002 ↑ | 0.28   |
| Cytohalasin D |         |    |       |      |         |        |
| Atta          | control | 10 | 8.96  | 0.38 | n/a     | n/a    |
|               | 0.1     |    | 9.22  | 0.16 | n/a     | 0.62   |
|               | 1       |    | 10.32 | 0.18 | n/a     | ↓ 0.02 |
|               | control | 20 | 6.95  | 0.35 | 0.001 ↑ | n/a    |
|               | 0.1     |    | 7.88  | 0.16 | 0.033 ↑ | 0.14   |
|               | 1       |    | 7.21  | 0.35 | 0.000 ↑ | 0.66   |
| DptA          | control | 10 | 10.86 | 0.07 | n/a     | n/a    |
|               | 0.1     |    | 8.41  | 0.12 | n/a     | ↑ 0.00 |
|               | 1       |    | 11.38 | 0.24 | n/a     | 0.33   |
|               | control | 20 | 4.52  | 0.05 | 0.000 ↑ | n/a    |
|               | 0.1     |    | 6.07  | 0.29 | 0.000 ↑ | ↑ 0.00 |
|               | 1       |    | 5.38  | 0.50 | 0.000 ↑ | 0.11   |
| CecA1         | control | 10 | 9.56  | 0.17 | n/a     | n/a    |
|               | 0.1     |    | 8.52  | 0.21 | n/a     | 0.08   |
|               | 1       |    | 8.89  | 0.19 | n/a     | 0.25   |
|               | control | 20 | 7.11  | 0.61 | 0.000 ↑ | n/a    |
|               | 0.1     |    | 7.62  | 0.32 | 0.166   | 0.36   |
|               | 1       |    | 8.12  | 0.31 | 0.219   | 0.10   |
| dpp           | control | 10 | 8.29  | 0.31 | n/a     | n/a    |
|               | 0.1     |    | 8.29  | 0.21 | n/a     | 1.00   |
|               | 1       |    | 7.87  | 0.15 | n/a     | 0.49   |
|               | control | 20 | 9.95  | 1.11 | 0.006 ↓ | n/a    |
|               | 0.1     |    | 8.23  | 0.12 | 0.916   | ↑ 0.00 |
|               | 1       |    | 7.79  | 0.20 | 0.875   | ↑ 0.00 |
| AICAR         |         |    |       |      |         |        |
| Atta          | control | 10 | 8.81  | 0.32 | n/a     | n/a    |
|               | 0.1     |    | 9.65  | 0.14 | n/a     | 0.11   |
|               | 1       |    | 8.60  | 0.29 | n/a     | 0.68   |
|               | control | 20 | 6.48  | 0.08 | 0.000 ↑ | n/a    |
|               | 0.1     |    | 5.35  | 0.34 | 0.000 ↑ | ↑ 0.05 |
|               | 1       |    | 5.51  | 0.39 | 0.000 ↑ | 0.08   |
| DptA          | control | 10 | 9.31  | 0.45 | n/a     | n/a    |
|               | 0.1     |    | 10.09 | 0.27 | n/a     | 0.13   |
|               | 1       |    | 6.29  | 0.64 | n/a     | ↑ 0.00 |
|               | control | 20 | 5.65  | 0.42 | 0.000 ↑ | n/a    |
|               | 0.1     |    | 5.70  | 0.46 | 0.000 ↑ | 0.92   |
|               | 1       |    | 4.71  | 0.26 | 0.004 ↑ | 0.09   |
| CecA1         | control | 10 | 8.27  | 0.23 | n/a     | n/a    |
|               | 0.1     |    | 8.78  | 0.16 | n/a     | 0.32   |
|               | 1       |    | 8.17  | 0.42 | n/a     | 0.85   |
|               | control | 20 | 5.98  | 0.05 | 0.000 ↑ | n/a    |
|               | 0.1     |    | 4.71  | 0.35 | 0.000 ↑ | ↑ 0.02 |
|               | 1       |    | 5.16  | 0.69 | 0.000 ↑ | 0.15   |
| dpp           | control | 10 | 10.36 | 0.16 | n/a     | n/a    |
|               | 0.1     |    | 10.97 | 0.42 | n/a     | 0.24   |
|               | 1       |    | 10.58 | 0.26 | n/a     | 0.65   |
|               | control | 20 | 12.08 | 0.32 | 0.001 ↓ | n/a    |
|               | 0.1     |    | 11.68 | 0.13 | 0.149   | 0.45   |
|               | 1       |    | 11.74 | 0.32 | 0.029 ↓ | 0.49   |

C ( $\mu$ M) – Concentration ( $\mu$ M); dCt – delta Ct (cycle thresholds) values were calculated as the differences in Ct values for target genes and reference genes ( *$\beta$ -Tubulin* and *RpL32*). The Ct values are inversely proportional to the mRNA transcript levels. Higher dCt values represent a lower expression level. SE – standard error of mean; DT (p) – p-values for the Duncan's post hoc test; AE – effect of age; TE – effect of treatment,  $\uparrow$  – increase,  $\downarrow$  – decrease; n/a – not applicable.
