# Supplementary material for: Studying the Geroprotective Properties of YAP/TAZ Signaling Inhibitors on Drosophila melanogaster Model
Source: MDPI journal article supplement (doi:10.3390/ijms24066006), 2023-03-22
Supplement: s1 [file s1]

**Table S7.** The expression level of Yki target genes in 20-day-old males after treatment with YAP/TAZ inhibitors.

| Gene               | Concentration (μM) | Mean (dCt) | SE   | DT (p)  |
|--------------------|--------------------|------------|------|---------|
| <b>Verteporfin</b> |                    |            |      |         |
| <i>CycE</i>        | 0 (control)        | 12.54      | 0.27 |         |
|                    | 0.01               | 12.59      | 0.15 | 0.8868  |
|                    | 0.1                | 12.11      | 0.21 | 0.2748  |
|                    | 1                  | 12.48      | 0.17 | 0.8704  |
|                    | 10                 | 12.30      | 0.14 | 0.5192  |
| <i>dally</i>       | 0 (control)        | 7.32       | 0.19 |         |
|                    | 0.01               | 7.29       | 0.32 | 0.9264  |
|                    | 0.1                | 7.26       | 0.11 | 0.8628  |
|                    | 1                  | 7.77       | 0.23 | 0.2844  |
|                    | 10                 | 7.41       | 0.15 | 0.7959  |
| <i>Diap1</i>       | 0 (control)        | 3.57       | 0.16 |         |
|                    | 0.01               | 3.10       | 0.14 | 0.1855  |
|                    | 0.1                | 3.81       | 0.21 | 0.5553  |
|                    | 1                  | 3.78       | 0.06 | 0.5928  |
|                    | 10                 | 3.73       | 0.09 | 0.6390  |
| <i>E2f1</i>        | 0 (control)        | 4.09       | 0.22 |         |
|                    | 0.01               | 3.73       | 0.21 | 0.3550  |
|                    | 0.1                | 4.60       | 0.24 | 0.2203  |
|                    | 1                  | 4.57       | 0.19 | 0.2384  |
|                    | 10                 | 4.52       | 0.12 | 0.2530  |
| <i>myc</i>         | 0 (control)        | 6.99       | 0.15 |         |
|                    | 0.01               | 6.27       | 0.04 | 0.0670  |
|                    | 0.1                | 6.27       | 0.16 | 0.0602  |
|                    | 1                  | 6.57       | 0.07 | 0.2622  |
|                    | 10                 | 6.65       | 0.16 | 0.3374  |
| <i>vn</i>          | 0 (control)        | 7.84       | 0.14 |         |
|                    | 0.01               | 7.76       | 0.18 | 0.8368  |
|                    | 0.1                | 7.42       | 0.13 | 0.3111  |
|                    | 1                  | 7.76       | 0.09 | 0.8384  |
|                    | 10                 | 7.77       | 0.06 | 0.8513  |
| <i>wg</i>          | 0 (control)        | 8.14       | 0.59 |         |
|                    | 0.01               | 9.95       | 0.65 | 0.0000↓ |
|                    | 0.1                | 8.60       | 0.75 | 0.1955  |
|                    | 1                  | 7.68       | 0.25 | 0.2634  |
|                    | 10                 | 8.71       | 0.23 | 0.1294  |
| <i>Yki</i>         | 0 (control)        | 4.81       | 0.25 |         |
|                    | 0.01               | 4.56       | 0.17 | 0.5303  |
|                    | 0.1                | 4.48       | 0.05 | 0.4309  |
|                    | 1                  | 4.86       | 0.11 | 0.8881  |
|                    | 10                 | 5.03       | 0.16 | 0.5640  |
| <b>ML-7</b>        |                    |            |      |         |
| <i>CycE</i>        | 0 (control)        | 13.38      | 0.35 |         |
|                    | 0.01               | 13.81      | 0.41 | 0.4932  |
|                    | 0.1                | 13.13      | 0.23 | 0.6885  |
|                    | 1                  | 11.35      | 0.87 | 0.0017↑ |
| <i>dally</i>       | 0 (control)        | 8.06       | 0.13 |         |
|                    | 0.01               | 8.25       | 0.20 | 0.7870  |
|                    | 0.1                | 7.60       | 0.11 | 0.5004  |
|                    | 1                  | 8.11       | 0.14 | 0.9355  |
| <i>Diap1</i>       | 0 (control)        | 3.63       | 0.28 |         |
|                    | 0.01               | 2.77       | 0.28 | 0.1991  |
|                    | 0.1                | 3.14       | 0.13 | 0.4395  |

|                |             |       |      |         |
|----------------|-------------|-------|------|---------|
|                | 1           | 3.80  | 0.23 | 0.7852  |
| <i>E2f1</i>    | 0 (control) | 3.98  | 0.10 |         |
|                | 0.01        | 3.87  | 0.25 | 0.8587  |
|                | 0.1         | 4.20  | 0.19 | 0.7280  |
|                | 1           | 4.23  | 0.11 | 0.7182  |
| <i>myc</i>     | 0 (control) | 6.93  | 0.10 |         |
|                | 0.01        | 7.18  | 0.28 | 0.7275  |
|                | 0.1         | 7.10  | 0.27 | 0.7981  |
|                | 1           | 7.06  | 0.19 | 0.8326  |
| <i>vn</i>      | 0 (control) | 8.29  | 0.33 |         |
|                | 0.01        | 8.07  | 0.31 | 0.7490  |
|                | 0.1         | 8.70  | 0.28 | 0.5160  |
|                | 1           | 4.45  | 1.72 | 0.0000↑ |
| <i>wg</i>      | 0 (control) | 7.52  | 0.14 |         |
|                | 0.01        | 6.62  | 0.78 | 0.2188  |
|                | 0.1         | 7.62  | 0.48 | 0.8808  |
|                | 1           | 9.44  | 0.37 | 0.0074↓ |
| <i>Yki</i>     | 0 (control) | 5.21  | 0.15 |         |
|                | 0.01        | 4.85  | 0.18 | 0.5935  |
|                | 0.1         | 4.43  | 0.17 | 0.2759  |
|                | 1           | 5.02  | 0.24 | 0.7625  |
| Cytochalasin D |             |       |      |         |
| <i>CycE</i>    | 0 (control) | 12.49 | 0.32 |         |
|                | 0.1         | 12.96 | 0.39 | 0.3198  |
|                | 1           | 13.00 | 0.33 | 0.3108  |
| <i>dally</i>   | 0 (control) | 7.96  | 0.30 |         |
|                | 0.1         | 6.79  | 0.28 | 0.0292  |
|                | 1           | 7.67  | 0.18 | 0.5632  |
| <i>Diap1</i>   | 0 (control) | 3.14  | 0.16 |         |
|                | 0.1         | 2.78  | 0.12 | 0.4505  |
|                | 1           | 3.39  | 0.33 | 0.6203  |
| <i>E2f1</i>    | 0 (control) | 3.69  | 0.32 |         |
|                | 0.1         | 3.19  | 0.25 | 0.3358  |
|                | 1           | 3.40  | 0.30 | 0.5338  |
| <i>myc</i>     | 0 (control) | 6.43  | 0.25 |         |
|                | 0.1         | 5.41  | 0.34 | 0.0387  |
|                | 1           | 6.74  | 0.34 | 0.5083  |
| <i>vn</i>      | 0 (control) | 7.47  | 0.27 |         |
|                | 0.1         | 7.80  | 0.29 | 0.5360  |
|                | 1           | 7.43  | 0.22 | 0.9299  |
| <i>wg</i>      | 0 (control) | 7.50  | 0.65 |         |
|                | 0.1         | 5.95  | 0.66 | 0.0028↑ |
|                | 1           | 8.01  | 0.43 | 0.3513  |
| <i>Yki</i>     | 0 (control) | 4.56  | 0.22 |         |
|                | 0.1         | 4.68  | 0.23 | 0.7915  |
|                | 1           | 4.38  | 0.19 | 0.7049  |
| AICAR          |             |       |      |         |
| <i>CycE</i>    | 0 (control) | 12.56 | 0.13 |         |
|                | 0.1         | 12.84 | 0.19 | 0.4536  |
|                | 1           | 12.06 | 0.11 | 0.1704  |
| <i>dally</i>   | 0 (control) | 7.82  | 0.15 |         |
|                | 0.1         | 7.96  | 0.14 | 0.7353  |
|                | 1           | 7.85  | 0.38 | 0.9350  |
| <i>Diap1</i>   | 0 (control) | 3.49  | 0.30 |         |
|                | 0.1         | 3.59  | 0.26 | 0.7687  |
|                | 1           | 3.61  | 0.23 | 0.7572  |
| <i>E2f1</i>    | 0 (control) | 4.09  | 0.09 |         |

|            |             |      |      |        |
|------------|-------------|------|------|--------|
|            | 0.1         | 4.28 | 0.19 | 0.6146 |
|            | 1           | 4.63 | 0.30 | 0.1844 |
| <i>myc</i> | 0 (control) | 6.93 | 0.33 |        |
|            | 0.1         | 6.54 | 0.16 | 0.3142 |
|            | 1           | 6.64 | 0.18 | 0.4254 |
| <i>vn</i>  | 0 (control) | 7.95 | 0.10 |        |
|            | 0.1         | 8.09 | 0.10 | 0.7231 |
|            | 1           | 8.01 | 0.11 | 0.8646 |
| <i>wg</i>  | 0 (control) | 8.51 | 0.51 |        |
|            | 0.1         | 8.58 | 0.46 | 0.8534 |
|            | 1           | 8.73 | 0.42 | 0.5803 |
| <i>Yki</i> | 0 (control) | 4.77 | 0.26 |        |
|            | 0.1         | 4.83 | 0.29 | 0.8725 |
|            | 1           | 4.50 | 0.18 | 0.4865 |

dCt – delta Ct (cycle thresholds) values were calculated as the differences in Ct values for target genes and reference genes (*β-Tubulin* and *RpL32*). The Ct values are inversely proportional to the mRNA transcript levels. Higher dCt values represent a lower expression level. SE – standard error of mean, p – p-value. Significance was determined by two-way ANOVA followed by post-hoc Duncan test (DT), ↑ – increase, ↓ – decrease.
