# Supplementary material for: Studying the Geroprotective Properties of YAP/TAZ Signaling Inhibitors on Drosophila melanogaster Model
Source: MDPI journal article supplement (doi:10.3390/ijms24066006), 2023-03-22
Supplement: s1 [file s1]

**Table S6.** Two-way ANOVA of the effect of Yap/Taz inhibitors on the expression level of Yki target genes in 20-day-old male and female flies.

| Substance | Sex | Source of variation  | SS       | DF  | MS      | F       | p        |
|-----------|-----|----------------------|----------|-----|---------|---------|----------|
| VP        | ♂   | Gene                 | 2500.13  | 7   | 357.16  | 645.18  | 0.000000 |
|           |     | Concentration        | 1.43     | 4   | 0.36    | 0.64    | 0.631395 |
|           |     | Gene × Concentration | 41.82    | 28  | 1.49    | 2.70    | 0.000016 |
|           |     | Error                | 176.04   | 318 | 0.55    |         |          |
| ML7       | ♂   | Gene                 | 2223.18  | 7   | 317.60  | 183.427 | 0.000000 |
|           |     | Concentration        | 7.34     | 3   | 2.45    | 1.413   | 0.239536 |
|           |     | Gene × Concentration | 177.42   | 21  | 8.45    | 4.880   | 0.000000 |
|           |     | Error                | 436.33   | 252 | 1.73    |         |          |
| CD        | ♂   | Gene                 | 1818.815 | 7   | 259.831 | 261.428 | 0.000000 |
|           |     | Concentration        | 12.744   | 2   | 6.372   | 6.411   | 0.002017 |
|           |     | Gene × Concentration | 28.694   | 14  | 2.050   | 2.062   | 0.015491 |
|           |     | Error                | 190.827  | 192 | 0.994   |         |          |
| AI        | ♂   | Gene                 | 1586.51  | 7   | 226.64  | 377.81  | 0.000000 |
|           |     | Concentration        | 0.30     | 2   | 0.15    | 0.25    | 0.777778 |
|           |     | Gene × Concentration | 5.63     | 14  | 0.40    | 0.67    | 0.801010 |
|           |     | Error                | 114.58   | 191 | 0.60    |         |          |
| VP        | ♀   | Gene                 | 2149.69  | 7   | 307.10  | 497.34  | 0.000000 |
|           |     | Concentration        | 23.68    | 4   | 5.92    | 9.59    | 0.000000 |
|           |     | Gene × Concentration | 31.29    | 28  | 1.12    | 1.81    | 0.008564 |
|           |     | Error                | 196.36   | 318 | 0.62    |         |          |
| ML7       | ♀   | Gene                 | 1227.88  | 7   | 175.41  | 203.32  | 0.000000 |
|           |     | Concentration        | 8.95     | 3   | 2.98    | 3.46    | 0.017056 |
|           |     | Gene × Concentration | 20.45    | 21  | 0.97    | 1.13    | 0.317857 |
|           |     | Error                | 220.85   | 256 | 0.86    |         |          |
| CD        | ♀   | Gene                 | 1127.89  | 7   | 161.13  | 267.66  | 0.000000 |
|           |     | Concentration        | 5.01     | 2   | 2.51    | 4.16    | 0.016996 |
|           |     | Gene × Concentration | 9.50     | 14  | 0.68    | 1.13    | 0.336278 |
|           |     | Error                | 113.17   | 188 | 0.60    |         |          |
| AI        | ♀   | Gene                 | 1029.68  | 7   | 147.10  | 238.92  | 0.000000 |
|           |     | Concentration        | 6.97     | 2   | 3.49    | 5.66    | 0.004083 |
|           |     | Gene × Concentration | 4.54     | 14  | 0.32    | 0.53    | 0.915857 |
|           |     | Error                | 117.59   | 191 | 0.62    |         |          |

VP – Verteporfin; ML7 – ML-7 hydrochloride; CD – Cytochalasin D; AI – AICAR; ♂ – male; ♀ – female; SS – sum-of-squares; DF – degrees of freedom; MS – mean squares. Results of F-tests: F – F-value and p – p-value.
