# Supplementary material for: Studying the Geroprotective Properties of YAP/TAZ Signaling Inhibitors on Drosophila melanogaster Model
Source: MDPI journal article supplement (doi:10.3390/ijms24066006), 2023-03-22
Supplement: s1 [file s1]

**Table S13.** Effect of Yap/Taz inhibitors on the expression level of antimicrobial genes *Atta*, *DptA*, *CecAI* and Wnt-related gene *dpp* in *Drosophila* males.

| Gene         | C (μM)  | Age (days) | Mean (dCt) | SE   | DT (p)   |          |
|--------------|---------|------------|------------|------|----------|----------|
|              |         |            |            |      | AE       | TE       |
| Verteporfin  |         |            |            |      |          |          |
| <i>Atta</i>  | control | 10         | 6.87       | 0.46 | n/a      | n/a      |
|              | 0.01    |            | 6.74       | 0.54 | n/a      | 0.7417   |
|              | 0.1     |            | 7.75       | 0.13 | n/a      | 0.0453 ↓ |
|              | control | 20         | 5.39       | 0.36 | 0.0002 ↑ | n/a      |
|              | 0.01    |            | 6.91       | 0.19 | 0.6847   | 0.0002 ↓ |
|              | 0.1     |            | 5.92       | 0.25 | 0.0000 ↑ | 0.1751   |
| <i>DptA</i>  | control | 10         | 7.04       | 0.46 | n/a      | n/a      |
|              | 0.01    |            | 7.46       | 0.43 | n/a      | 0.3290   |
|              | 0.1     |            | 8.41       | 0.18 | n/a      | 0.0008 ↓ |
|              | control | 20         | 4.86       | 0.15 | 0.0000 ↑ | n/a      |
|              | 0.01    |            | 6.14       | 0.09 | 0.0016 ↑ | 0.0012 ↓ |
|              | 0.1     |            | 5.70       | 0.27 | 0.0000 ↑ | 0.0310 ↓ |
| <i>CecAI</i> | control | 10         | 0.94       | 0.08 | n/a      | n/a      |
|              | 0.01    |            | 0.64       | 0.18 | n/a      | 0.4268   |
|              | 0.1     |            | 0.36       | 0.11 | n/a      | 0.1393   |
|              | control | 20         | 1.54       | 0.13 | 0.1339   | n/a      |
|              | 0.01    |            | 1.32       | 0.09 | 0.0917   | 0.5505   |
|              | 0.1     |            | 1.32       | 0.12 | 0.0150 ↓ | 0.5729   |
| <i>dpp</i>   | control | 10         | 7.46       | 0.11 | n/a      | n/a      |
|              | 0.01    |            | 7.35       | 0.36 | n/a      | 0.7759   |
|              | 0.1     |            | 7.44       | 0.16 | n/a      | 0.9474   |
|              | control | 20         | 7.03       | 0.17 | 0.3218   | n/a      |
|              | 0.01    |            | 7.34       | 0.12 | 0.9911   | 0.4319   |
|              | 0.1     |            | 6.74       | 0.06 | 0.1119   | 0.4806   |
| ML-7         |         |            |            |      |          |          |
| <i>Atta</i>  | control | 10         | 5.18       | 0.47 | n/a      | n/a      |
|              | 0.1     |            | 5.08       | 0.26 | n/a      | 0.9145   |
|              | 1       |            | 5.71       | 0.34 | n/a      | 0.5601   |
|              | control | 20         | 3.79       | 0.40 | 0.1984   | n/a      |
|              | 0.1     |            | 2.75       | 0.38 | 0.0303 ↑ | 0.3192   |
|              | 1       |            | 3.45       | 0.17 | 0.0348 ↑ | 0.7118   |
| <i>DptA</i>  | control | 10         | 4.99       | 0.26 | n/a      | n/a      |
|              | 0.1     |            | 3.94       | 0.27 | n/a      | 0.2830   |
|              | 1       |            | 5.06       | 0.73 | n/a      | 0.9374   |
|              | control | 20         | 3.30       | 0.29 | 0.1085   | n/a      |
|              | 0.1     |            | 3.05       | 0.49 | 0.3955   | 0.7824   |
|              | 1       |            | 4.25       | 0.10 | 0.4041   | 0.3688   |
| <i>CecAI</i> | control | 10         | 0.85       | 0.11 | n/a      | n/a      |
|              | 0.1     |            | 0.88       | 0.08 | n/a      | 0.9790   |
|              | 1       |            | 2.08       | 0.09 | n/a      | 0.2087   |
|              | control | 20         | 0.28       | 0.08 | 0.5564   | n/a      |
|              | 0.1     |            | 0.40       | 0.10 | 0.6259   | 0.8934   |
|              | 1       |            | 0.10       | 0.15 | 0.0576   | 0.8486   |
| <i>dpp</i>   | control | 10         | 7.33       | 0.33 | n/a      | n/a      |
|              | 0.1     |            | 6.25       | 0.86 | n/a      | 0.2393   |
|              | 1       |            | 8.23       | 0.38 | n/a      | 0.3746   |
|              | control | 20         | 9.85       | 2.13 | 0.0120 ↓ | n/a      |

|               |         |    |       |      |          |          |
|---------------|---------|----|-------|------|----------|----------|
|               | 0.1     |    | 7.34  | 0.11 | 0.2626   | 0.0108 ↑ |
|               | 1       |    | 7.63  | 0.31 | 0.5080   | 0.0207 ↑ |
| Cytohalasin D |         |    |       |      |          |          |
| Atta          | control | 10 | 9.67  | 0.13 | n/a      | n/a      |
|               | 0.1     |    | 8.31  | 0.45 | n/a      | 0.0820   |
|               | 1       |    | 8.13  | 0.22 | n/a      | 0.0524   |
|               | control | 20 | 6.70  | 0.71 | 0.0001 ↑ | n/a      |
|               | 0.1     |    | 5.26  | 0.74 | 0.0000 ↑ | 0.0499 ↑ |
|               | 1       |    | 5.75  | 0.54 | 0.0012 ↑ | 0.1754   |
| DptA          | control | 10 | 9.56  | 0.10 | n/a      | n/a      |
|               | 0.1     |    | 8.64  | 0.41 | n/a      | 0.2183   |
|               | 1       |    | 9.29  | 0.19 | n/a      | 0.6990   |
|               | control | 20 | 7.23  | 0.50 | 0.0023 ↑ | n/a      |
|               | 0.1     |    | 4.34  | 0.41 | 0.0000 ↑ | 0.0001 ↑ |
|               | 1       |    | 5.18  | 0.37 | 0.0000 ↑ | 0.0068 ↑ |
| CecA1         | control | 10 | 0.94  | 0.10 | n/a      | n/a      |
|               | 0.1     |    | 3.65  | 1.40 | n/a      | 0.0003   |
|               | 1       |    | 0.87  | 0.07 | n/a      | 0.9162   |
|               | control | 20 | 1.07  | 0.20 | 0.8602   | n/a      |
|               | 0.1     |    | 1.88  | 0.15 | 0.0114 ↑ | 0.2759   |
|               | 1       |    | 1.11  | 0.11 | 0.7620   | 0.9536   |
| dpp           | control | 10 | 10.46 | 0.20 | n/a      | n/a      |
|               | 0.1     |    | 11.34 | 0.67 | n/a      | 0.2385   |
|               | 1       |    | 10.14 | 0.18 | n/a      | 0.6503   |
|               | control | 20 | 12.03 | 0.53 | 0.0388 ↓ | n/a      |
|               | 0.1     |    | 11.27 | 0.79 | 0.9239   | 0.3109   |
|               | 1       |    | 9.78  | 0.11 | 0.6084   | 0.0034 ↑ |
| AICAR         |         |    |       |      |          |          |
| Atta          | control | 10 | 7.22  | 0.48 | n/a      | n/a      |
|               | 0.1     |    | 8.33  | 0.30 | n/a      | 0.2347   |
|               | 1       |    | 7.19  | 0.38 | n/a      | 0.9728   |
|               | control | 20 | 5.62  | 0.52 | 0.0833   | n/a      |
|               | 0.1     |    | 3.88  | 0.30 | 0.0000 ↑ | 0.0670   |
|               | 1       |    | 4.57  | 0.07 | 0.0042 ↑ | 0.2451   |
| DptA          | control | 10 | 7.53  | 0.28 | n/a      | n/a      |
|               | 0.1     |    | 8.37  | 0.35 | n/a      | 0.3543   |
|               | 1       |    | 7.35  | 0.58 | n/a      | 0.8335   |
|               | control | 20 | 5.94  | 0.55 | 0.0938   | n/a      |
|               | 0.1     |    | 4.24  | 0.32 | 0.0000 ↑ | 0.0725   |
|               | 1       |    | 5.07  | 0.15 | 0.0157 ↑ | 0.3388   |
| CecA1         | control | 10 | 0.43  | 0.14 | n/a      | n/a      |
|               | 0.1     |    | 0.10  | 0.17 | n/a      | 0.7140   |
|               | 1       |    | 0.77  | 0.04 | n/a      | 0.6895   |
|               | control | 20 | 1.11  | 0.21 | 0.4676   | n/a      |
|               | 0.1     |    | 0.30  | 0.20 | 0.8106   | 0.4004   |
|               | 1       |    | 0.94  | 0.10 | 0.8395   | 0.8342   |
| dpp           | control | 10 | 11.10 | 0.38 | n/a      | n/a      |
|               | 0.1     |    | 14.44 | 1.55 | n/a      | 0.0002 ↓ |
|               | 1       |    | 11.77 | 1.25 | n/a      | 0.4601   |
|               | control | 20 | 12.68 | 0.80 | 0.0875   | n/a      |
|               | 0.1     |    | 11.44 | 0.30 | 0.0009 ↑ | 0.1663   |
|               | 1       |    | 13.10 | 1.35 | 0.1355   | 0.6148   |

C ( $\mu$ M) – Concentration ( $\mu$ M); dCt – delta Ct (cycle thresholds) values were calculated as the differences in Ct values for target genes and reference genes ( *$\beta$ -Tubulin* and *RpL32*). The Ct values are inversely proportional to the mRNA transcript levels. Higher dCt values represent a lower expression level. SE – standard error of mean; DT (p) – p-values for the Duncan's post hoc test; AE – effect of age; TE – effect of treatment,  $\uparrow$  – increase,  $\downarrow$  – decrease; n/a – not applicable.
